# Supplementary material for: Guanosine-rich aptamers@Cu2O nanoparticles: enhanced peroxidase activity and specific recognition capability at neutral pH
Source: Royal Society of Chemistry journal article supplement (doi:10.1039/d0cc06877b), 2020-12-10
Supplement: d0cc06877b1.pdf [file d0cc06877b1.pdf]

## Supplementary Information

### Guanosine-rich Aptamers@Cu<sub>2</sub>O Nanoparticles: Enhanced Peroxidase Activity and Specific Recognition Capability at Neutral pH

Hongchao Ma<sup>\*a</sup>, Lan Wang<sup>a</sup>, Yifan Li<sup>a</sup>, Yanhui Wei<sup>\*b</sup>

- a. State Key Laboratory of Heavy Oil Processing and Center for Bioengineering and Biotechnology, College of Chemical Engineering, China University of Petroleum (East China), Qingdao 266580, China, mahc@upc.edu.cn
- b. College of Chemistry and Material Science, Shandong Agricultural University, Taian, 271018, Shandong, PR China, yhwei@sdau.edu.cn

## Experimental procedure

### 1.1 Materials

Copper (II) chloride dihydrate and ascorbic acid were obtained from Aladdin. Sodium hydroxide and hydrogen peroxide were purchased from Shanghai Chemical Reagent Co., Ltd. The 3,3',5,5'-tetramethylbenzidine (TMB), 2,2'-azino-bis(3-ethylbenzothiazoline-6-sulfonic acid) (ABTS), thrombin, bovine serum albumin, human IgG and lysozyme were bought from Sigma-Aldrich. All ssDNA sequences were synthesized and purified by Sangon Biotech Co., Ltd.

### 1.2 Preparation of hollow Cu<sub>2</sub>O nanocubes

Firstly, about 120 μL of 0.1 M CuCl<sub>2</sub> aqueous solution and 38 μL of 0.6 M NaOH aqueous solution were sequentially added into 2.0 mL water. Then 90 μL of 0.1 M ascorbic acid aqueous solution was added. The mixture was left undisturbed for 60 min in a 30 °C water bath. The reaction solution was then centrifuged and washed with water for three times to get the final product.

### 1.3 Characterization

The TEM images of the sample were carried out by a JEOL JEM-1400 Plus transmission electron microscope. The SEM images of the samples were taken by S-4800 (HITACHI, Japan) scanning electron microscopy. X-Ray diffraction patterns were measured at 25 °C using Rigaku. Datas were collected on Rigaku D/max 2500

instrument equipped with a Cu filter under the following conditions: scan speed, 2°/min; Cu K $\alpha$  radiation,  $\lambda = 1.5405 \text{ \AA}$ . Hitachi U-3010 spectrophotometer was used to record the UV-Vis spectra of the various samples. The zeta potential was recorded by a dynamic light scattering technique (Zetasizer Nano, Malvern).

#### **1.4 Peroxidase catalytic activity evaluation of Cu<sub>2</sub>O**

To evaluate the catalytic activity of Cu<sub>2</sub>O hollow nanocubes, the oxidation of TMB was performed. Typically, Cu<sub>2</sub>O (5 mg/mL, 10  $\mu$ L) was dispersed into acetate buffer (0.2 M, pH = 4.5, 2.0 mL). Then TMB (0.05 M dissolved in DMSO, 10  $\mu$ L) and H<sub>2</sub>O<sub>2</sub> (30 wt%, 10  $\mu$ L) were added into the above solution. The mixture was incubated at room temperature for 30 min, and then the absorbance data was collected using UV-vis absorption spectroscopy. The peroxidase catalytic activity of Cu<sub>2</sub>O in different pH media was determined using the above procedure except of changing the buffer solution.

#### **1.5 The 6-mer ssDNA sequences “turn on” Cu<sub>2</sub>O catalytic activity at neutral pH**

Cu<sub>2</sub>O (5 mg/mL, 10  $\mu$ L) and 5  $\mu$ M 6-mer ssDNA sequences (A6, T6, C6, G6) were dispersed into the mixture of 50  $\mu$ L pH7.4 PBS buffer and 350  $\mu$ L deionized water, which was then incubated for 10 min. Then TMB (0.05 M dissolved in DMSO, 10  $\mu$ L) and H<sub>2</sub>O<sub>2</sub> (30 wt%, 5  $\mu$ L) were added into the above solution. The mixture was reacted at room temperature for 30 min, and then the absorbance data was collected using UV-vis absorption spectroscopy.

#### **1.6 Guanosine-rich aptamers “turn on” Cu<sub>2</sub>O catalytic activity at neutral pH**

The procedure was similar to 6-mer ssDNA sequences (A6, T6, C6, G6) except for changing the ssDNA sequences to Guanosine-rich aptamers (including IBA, KBA, HBA and TBA) with the concentration of 5  $\mu$ M.

#### **1.7 Thrombin colorimetric sensing using Cu<sub>2</sub>O-TBA complex**

Cu<sub>2</sub>O (5 mg/mL, 10  $\mu$ L) and TBA solution (30  $\mu$ M, 40  $\mu$ L) were dispersed into the mixture of 50  $\mu$ L pH7.4 PBS buffer and 350  $\mu$ L deionized water, which was then incubated at room temperature for 10 min. Then 20  $\mu$ L thrombin solution with different concentration was added into the above mixture and incubated for another 10 min. After that, TMB (0.05 M dissolved in DMSO, 10  $\mu$ L) and H<sub>2</sub>O<sub>2</sub> (30 wt%, 5  $\mu$ L) were added

into the above solution. The mixture was reacted at room temperature for 30 min, and then the absorbance data was collected using UV-vis absorption spectroscopy.

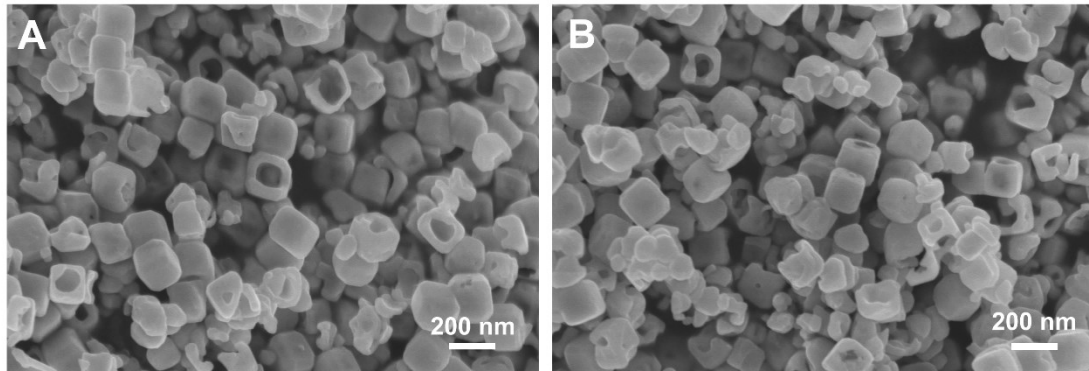

**Figure S1.** SEM images of Cu<sub>2</sub>O.

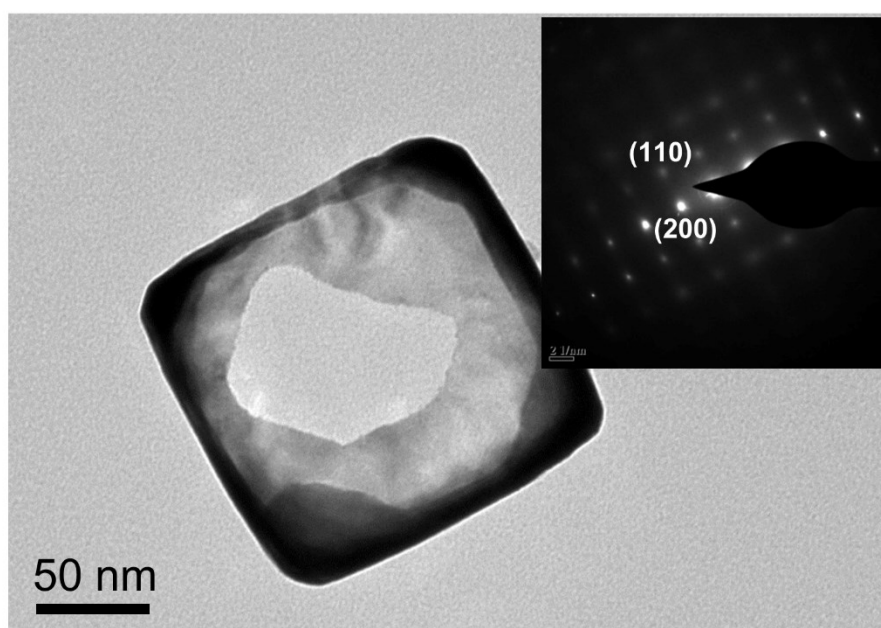

**Figure S2.** HRTEM image of hollow Cu<sub>2</sub>O nanocube. Inset is the corresponding SAED pattern.

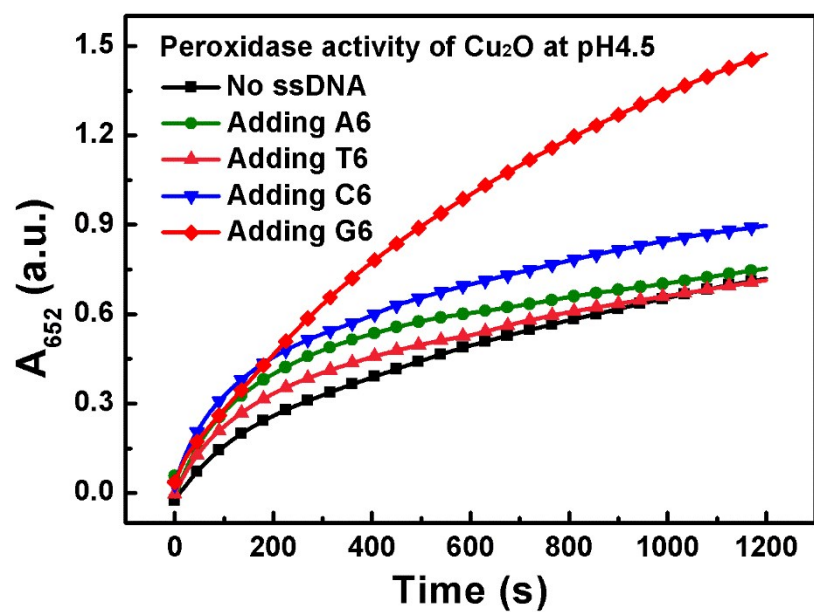

**Figure S3.** The effect of the addition of different ssDNA sequences on the peroxidase activity of Cu<sub>2</sub>O at acid pH condition (pH = 4.5).

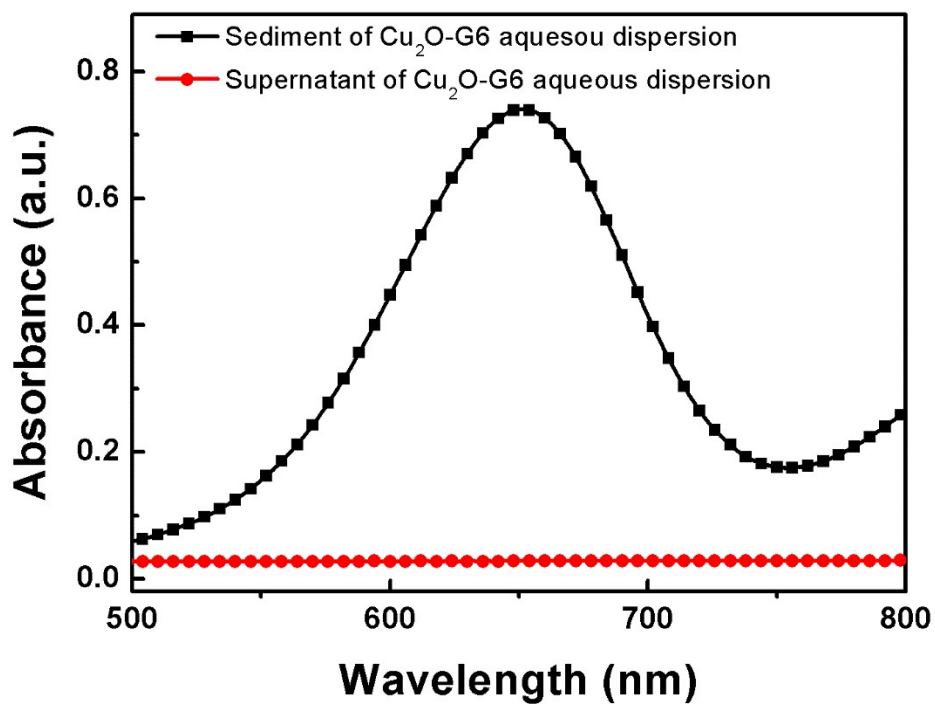

**Figure S4.** UV-vis absorption spectra of catalytic reaction catalyzed by the sediment and supernatant of Cu<sub>2</sub>O-G6 aqueous dispersion using TMB as substrate in the presence of H<sub>2</sub>O<sub>2</sub>.

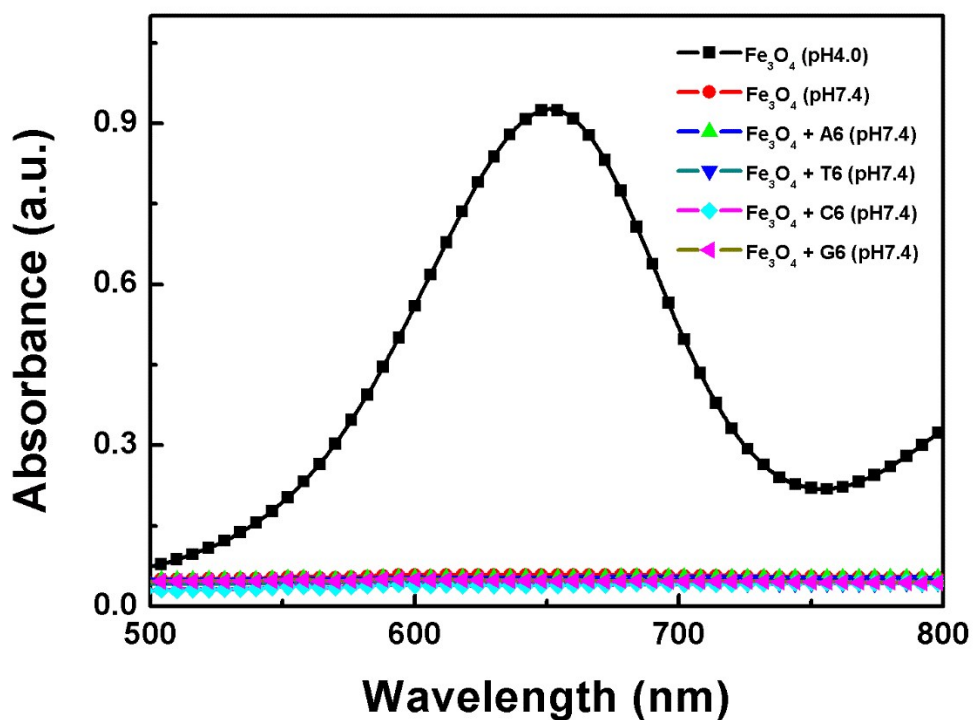

**Figure S5.** UV-vis absorption spectra of TMB oxidation catalyzed by  $\text{Fe}_3\text{O}_4$  nanoparticle (at pH 4.0),  $\text{Fe}_3\text{O}_4$  nanoparticle (at pH 7.4),  $\text{Fe}_3\text{O}_4$  nanoparticle + A6 (at pH 7.4),  $\text{Fe}_3\text{O}_4$  nanoparticle + T6 (at pH 7.4),  $\text{Fe}_3\text{O}_4$  nanoparticle + C6 (at pH 7.4) and  $\text{Fe}_3\text{O}_4$  nanoparticle + G6 (at pH 7.4) in the presence of  $\text{H}_2\text{O}_2$ .

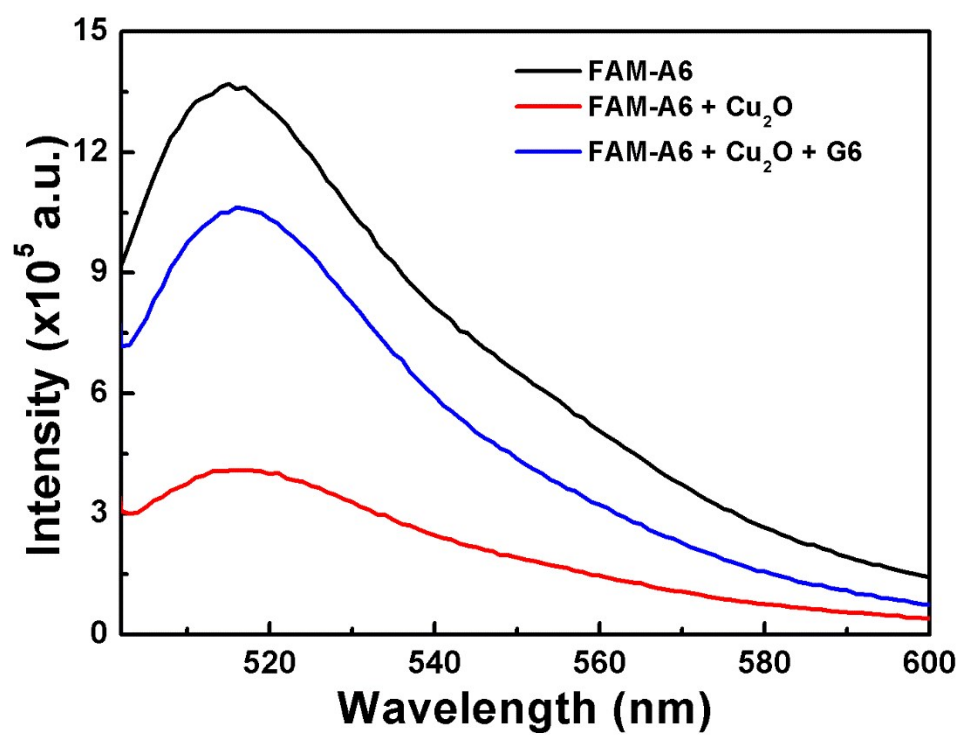

**Figure S6.** Fluorescence spectra of FAM-A6, FAM-A6 + Cu<sub>2</sub>O and FAM-A6 + Cu<sub>2</sub>O + G6.



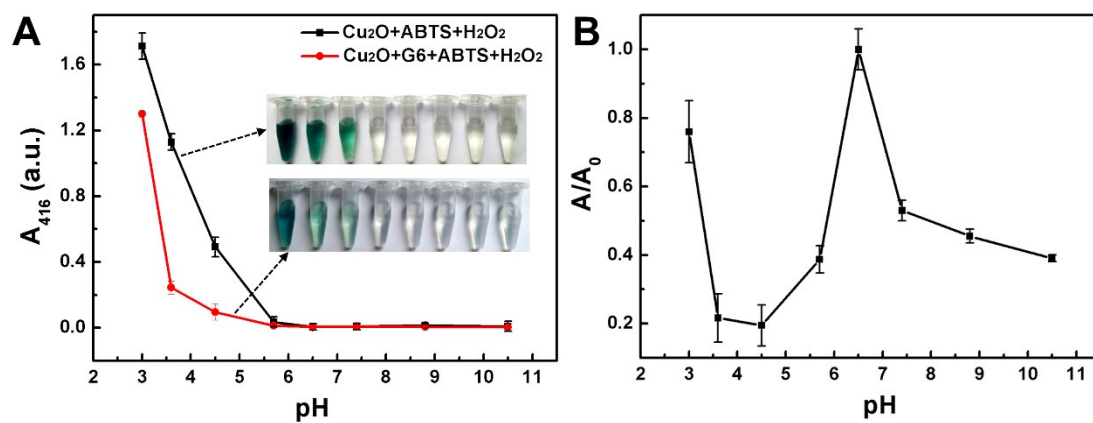

**Figure S7.** (A) Comparison of oxidation reaction of ABTS by  $\text{Cu}_2\text{O}$  in the absence and presence of G6 at different pH values; (B) The absorbance ratio changes of oxidation reaction of ABTS by  $\text{Cu}_2\text{O}$  after and before the addition of G6 at different pH values.

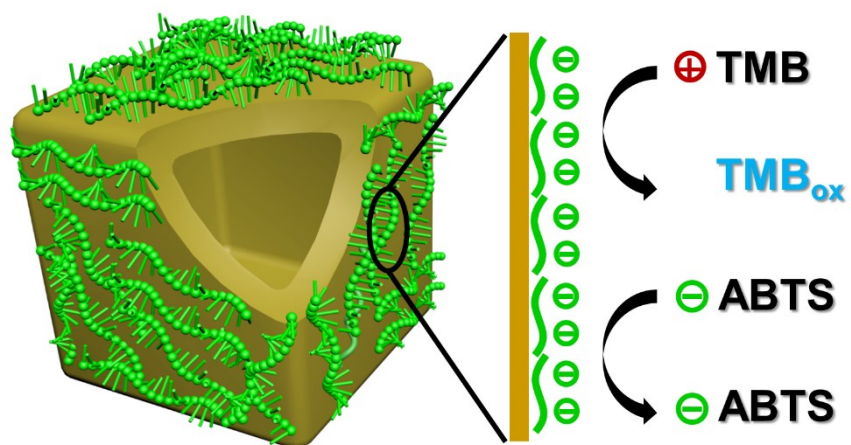

**Figure S8.** Illustration of the mechanism for the enhancement of peroxidase activity of the  $\text{Cu}_2\text{O}$  toward TMB.

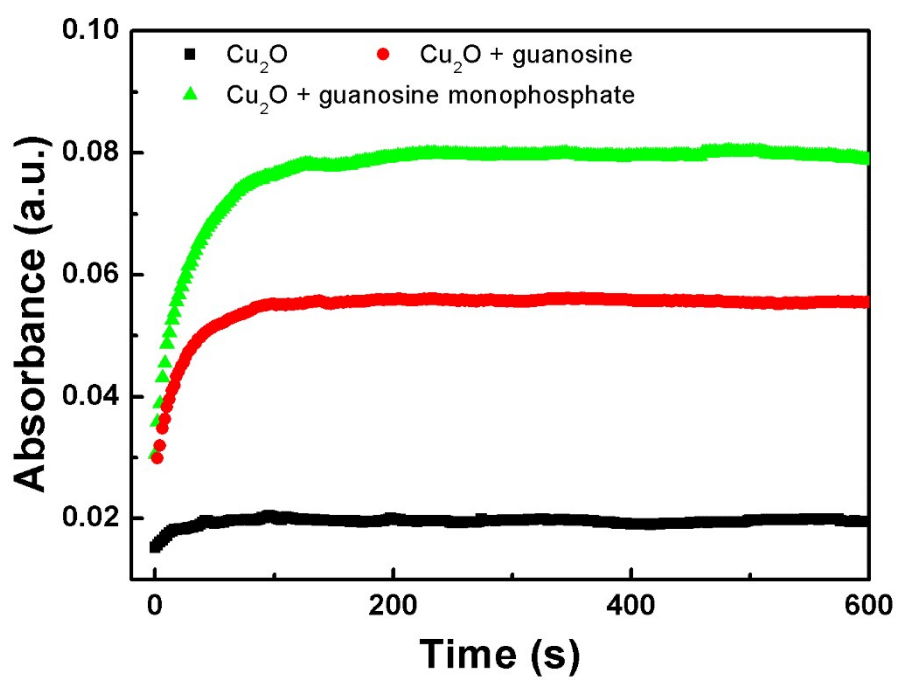

**Figure S9.** The enhancement of Cu<sub>2</sub>O peroxidase activity by guanosine and guanosine monophosphate at neutral pH condition (pH=7.4).

**Table S1. DNA sequences used in this study.**

| <b>DNA Name</b> | <b>Sequence (5' to 3')</b>          |
|-----------------|-------------------------------------|
| A6              | AAAAAA                              |
| T6              | TTTTTT                              |
| G6              | GGGGGG                              |
| C6              | CCCCCC                              |
| FAM-A6          | FAM-AAAAAA                          |
| IBA             | GGTGGGGGTTGGTAGGGTGTCTTC            |
| KBA             | TGGGGGTTGAGGCTAAGCCGA               |
| HBA             | TAGCGATACTGCGTGGGTTGGGGCGGGTAGGGCCA |
|                 | GCAGTCTCGT                          |
| TBA             | GGTTGGTGTGGTTGG                     |

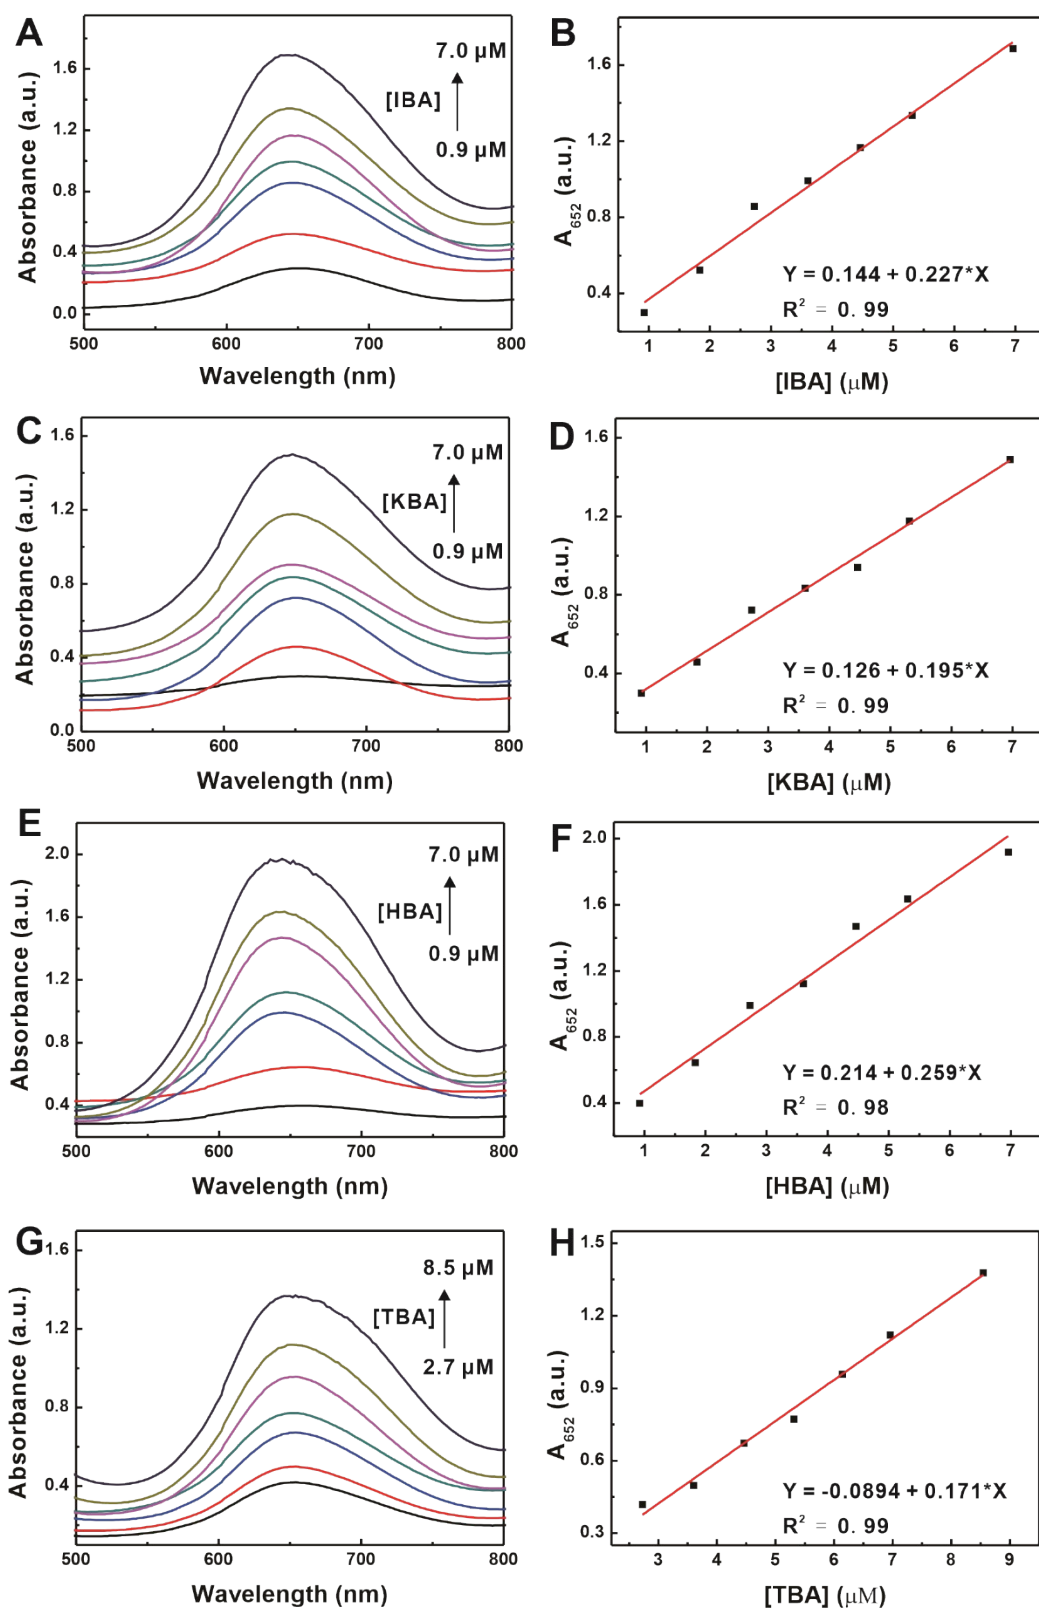

**Figure S10.** The enhancement of peroxidase activity of Cu<sub>2</sub>O by G-rich aptamers with different concentrations (A) IBA; (C) KBA; (E) HBA; (G) TBA. Linear response of the Cu<sub>2</sub>O peroxidase activity to aptamer concentration (B) IBA; (D) KBA; (F) HBA; (H) TBA.
